# Supplementary material
Source: HighWire-hosted journal article supplement (https://www.genetics.org/content/suppl/2012/04/13/genetics.112.138537)
Supplement: FigureS1.pdf [file FigureS1.pdf]

Figure S1

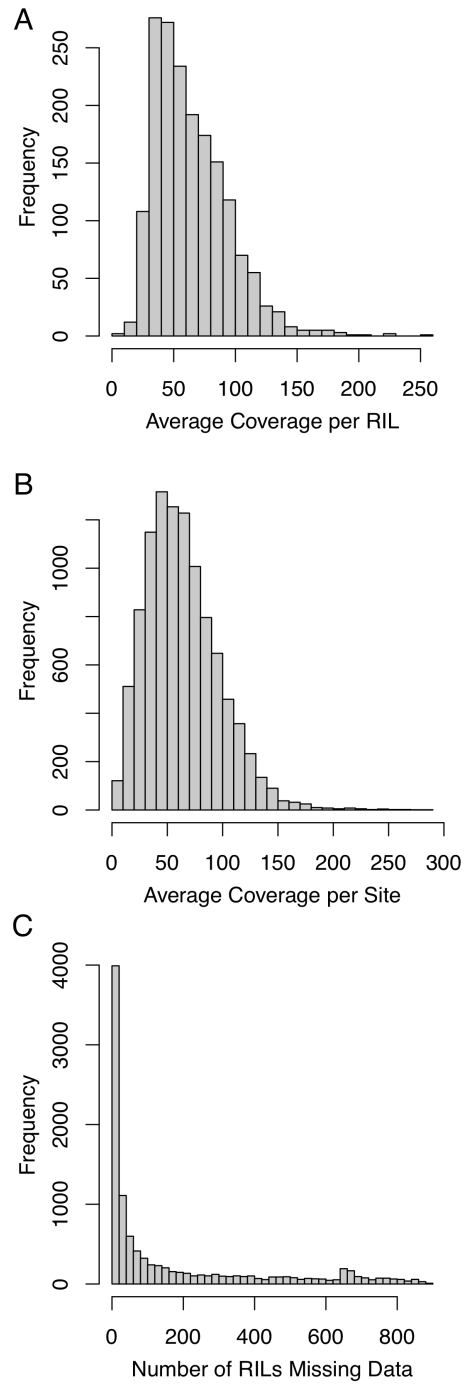

**Figure S1** A) The distribution of the average coverage across sites for each RIL. B) The distribution of average coverage across RILs for each marker. C) The distribution of the number of RILs missing data for each marker.
